## 1 **New Admissions and Asymptomatic TB Cases fuel TB Epidemic in Prisons, a** 2 **Cross Sectional Survey in Tanzania**

3 Chacha David Mangu<sup>1†</sup>, Petra Clowes<sup>1,6</sup>, Jan van den Hombergh<sup>2</sup>, Clement  
4 Mwakabenga<sup>1</sup>, Simeon Mwanyonga<sup>1</sup>, Jane Ambindwile<sup>1</sup>, Faith Kayombo<sup>1</sup>, Monica  
5 Minja<sup>1</sup>, Samuel Kalluvya<sup>3</sup>, Lisa Gerwing-Adima<sup>3,4</sup>, Christa Kasang<sup>4</sup>, Andreas Mueller<sup>4</sup>,  
6 Edward Chilolo<sup>2</sup>, Juma Angolwisye<sup>5</sup>, Dickson Nsajigwa<sup>5</sup>, Adili Kachima<sup>5</sup>, Deus Kamala<sup>6</sup>,  
7 Beatrice Mutayobya<sup>6</sup>, Nyanda Elias Ntinginya<sup>1</sup>, Michael Hoelscher<sup>7,8</sup>, Elmar Saathoff<sup>7,8</sup>  
8 and Andrea Rachow<sup>7,8</sup>

### 9 **Author's Affiliations**

- 10 1. National Institute for Medical Research, Mbeya Medical Research Center, Tanzania
- 11 2. PharmAccess International, Tanzania
- 12 3. Bugando Medical Centre, Mwanza, Tanzania
- 13 4. Medical Mission Institute, Wuerzburg, Germany
- 14 5. Ministry of Home Affairs; Prison Authority
- 15 6. National TB and Leprosy Program, Tanzania
- 16 7. Division of Infectious Diseases and Tropical Medicine, University Hospital, LMU Munich,  
17 Germany
- 18 8. German Center for Infection Research (DZIF), Partner Site Munich, Germany

### 19 **†Corresponding Author**

20 **Email: [cmangu@nimr-mmrc.org](mailto:cmangu@nimr-mmrc.org), +255713238757.**

## 21 **ABSTRACT**

### 22 **Background**

23 There is an increased risk for tuberculosis (TB) infection and disease progression in  
24 prison settings. TB prevalence in prisons of high and middle/low income countries have  
25 been measured to be between 5 and 50 -times higher than in the general population.

### 26 **Methods**

27 We performed TB active case finding in five central prisons, Keko, Segerea, Ukonga,  
28 Butimba and Ruanda prison in Tanzania, using the Xpert MTB/RIF® assay on early  
29 morning or spot sputum sample from inmates and new entries between April 2014 and  
30 July 2015.

### 31 **Results**

32 Out of 13,868 prisoners tested, 13,763 had valid results. TB prevalence was 1.55%  
33 (214/13,763); new admissions contributed to the majority (61.68%) of TB cases, but  
34 prevalence was higher among inmates (1.75%) compared to new admissions (1.45%).  
35 Ukonga, an urban prison which incarcerates long-term convicted inmates had the  
36 highest prevalence of 4.02%. Male gender (OR=2.51,  $p<0.001$ ), repeated incarcerations  
37 (OR=2.85,  $p<0.001$ ), history of TB treatment (OR=1.78,  $p=0.002$ ), TB symptoms  
38 (OR=2.78,  $p=0.006$ ) and HIV infection (OR=2.86,  $p=0.002$ ) were associated with  
39 positive TB results.

### 40 **Conclusion**

41 New admissions could be the driving force of the TB epidemic in the penitentiary  
42 system. However, prison environments remain a major risk factor for developing active  
43 TB disease.

44

## 45 INTRODUCTION

46 Despite the efforts to reduce the global burden of TB, it has been one of the infectious  
47 diseases causing substantial morbidity and mortality especially in Asia and Sub-  
48 Saharan Africa<sup>1, 2</sup>. It is estimated that 10.6 million people developed TB in 2021, 25% of  
49 which occurred in Africa and caused 1.6 million deaths<sup>3</sup>. TB remains one of the major  
50 causes of death among people living with HIV (PLHIV) causing 187,000 deaths in 2021  
51 <sup>3</sup>. TB cases are still under-reported; approximately 6.4 million cases (only 60.4% of  
52 global estimated cases) were diagnosed and notified in 2021<sup>3</sup>. The majority of missed  
53 TB cases most likely occur among people who lack free or direct access to health care  
54 services such as prisoners and people incarcerated. Worldwide, it is estimated that  
55 more than 9 million people are incarcerated at any point in time<sup>2</sup>, and therefore faced  
56 with a high risk environment for new TB infection and fastening the progression of latent  
57 to active TB which, among others, is promoted by overcrowding, poor ventilation and  
58 poor diet <sup>4, 5</sup>. Limited access to health care services results in late case detection and  
59 delayed treatment initiation with potential poor adherence sustaining the ongoing TB  
60 transmission in prisons <sup>4, 5</sup>.

61 Despite its highly endemic nature, prevalence of TB in prisons is largely unknown in  
62 many countries. Systematic reviews showed incidences of 237.6 per 100,000 and  
63 1,942.8 per 100,000 person-years in high and middle/low-income countries,  
64 respectively<sup>6, 7</sup>. Some studies have shown TB rates among inmates as high as 5 to 50  
65 times greater than those of the general population across developed and developing  
66 countries, respectively<sup>8</sup>. Active mass screening studies in Malawi, Ivory Coast, Zambia,  
67 Botswana, Cameroon and Ethiopia, found TB prevalence among prisoners of about 7 to  
68 more than 10 times higher than in the general population<sup>9-14</sup>. In Tanzania, a study at  
69 Bugando Hospital, Mwanza, showed a proportion of 41% of smear-positive TB cases  
70 among prisoners with presumptive TB referred for diagnosis<sup>15</sup>.

71  
72 Despite the high TB prevalence and complexity that exists in the control of tuberculosis  
73 in prisons, TB detection in most prisons still rely on symptomatic screening<sup>16</sup>, however  
74 with the availability of approved molecular diagnostic tests, such as GeneXpert, which  
75 are more sensitive, easy to perform and rapid, the systematic TB screening in a large

76 number of persons within a short time has been made possible<sup>19</sup>. The aim of this study  
77 was to implement a screening strategy to actively detect TB in five central prisons in  
78 Tanzania mainland using GeneXpert MTB/RIF and accurately measure the prevalence,  
79 and understand the related risk factors of TB in prisons.

80

## 81 **METHODS**

### 82 ***Prisons and study groups***

83 The project was implemented in five central prisons in Tanzania; Keko, Segerea and  
84 Ukonga Prisons within the highly populated business capital of the Indian Ocean coast  
85 region Dar es Salaam; Butimba Prison in Northwest region, Mwanza; and Ruanda  
86 Prison in the Southern Highland region, Mbeya. All prisons are located in urban settings  
87 but admit prisoners from both urban and rural communities. According to the Tanzanian  
88 prison authority, during the study period, these prisons housed an average of about  
89 8,000 inmates in total and have a turnover of more than 15,000 new admissions and  
90 discharges per year. TB screening was done among those who newly entered the  
91 prison, were transferred in from another prison and inmates present in the prisons at the  
92 beginning of the study.

### 93 ***Study procedures***

94 The project was implemented between April 2014 and June 2015. A screening  
95 questionnaire administered by trained prison health staffs. was used to collect  
96 demographic information, date of entry into prison, history of previous imprisonment,  
97 number of inmates sharing a cell, presence of cell mate(s) treated for TB, TB  
98 symptoms, self-reported past history of TB treatment, self-reported HIV status and use  
99 of anti-retroviral treatment (ART). One spontaneously expectorate sputum sample was  
100 collected from all study participants by a trained prison health facility staff, a nurse or  
101 laboratory technician. TB diagnosis was done using the GeneXpert MTB/RIF<sup>®</sup> assay  
102 (Xpert; Cepheid, Sunnyvale, California, US), which was stationed at each prison health  
103 facility and operated by trained laboratory technicians who were also prison staff. In  
104 case of a failed test (“error”, “invalid” or “no result”), Xpert testing was repeated on the  
105 same sample or a newly collected sample if the sample was either inadequate,

106 discarded or of poor quality. For those consented for HIV testing, HIV diagnosis was  
107 done according to the national guidelines using SD Bioline HIV-1/2 3.0 (Standard  
108 Diagnostics, Inc. Yongin, South Korea), and confirmed by Alere Determine HIV-1/2  
109 (Alere Inc. Massachusetts, USA) and Uni-Gold HIV-1/2 (Trinity Biotech, Co. Wicklow,  
110 Ireland).

### 111 ***Ethical consideration***

112 The study obtained ethical clearance from the National Health Research and Ethics  
113 Committee of the National Institute for Medical Research, Tanzania. It was also  
114 approved by the Prison Headquarters as well as the National TB and Leprosy Program  
115 in Tanzania.

116 Screening was voluntary; prisoners consented to participate and thumb printed the  
117 informed consent form before study procedures were done. HIV diagnosis was done  
118 through provider initiated testing and counseling (PITC) by a nurse counselor. Prisoners  
119 who refused to test for HIV were not excluded from TB screening. Those diagnosed to  
120 have TB or HIV were linked to care at the respective prison health facilities. Only  
121 prisoners 18 years and above were included in the study.

### 122 ***Statistical analysis***

123 The main endpoint of this study was bacteriologically confirmed TB diagnosed by Xpert.  
124 Univariate analysis was performed to describe the study population of screened  
125 prisoners and the prevalence of TB in different strata of the independent variables.

126 A conceptual frame work (Fig. 1) was established to guide multivariable logistic  
127 regression analysis in three levels. Variables with a p-value of  $<0.1$  were retained and  
128 used to adjust for variables in the subsequent level and retained in the last model; and  
129 variables in the last model with the p-value of  $<0.05$  were considered significant risk  
130 factors for TB in prisons. Variables considered distal to the outcome and those proximal  
131 to the outcome were in the first and last levels respectively. Number of cell mates was  
132 forced into the final model due to its importance in assessing overcrowding within prison  
133 cells. Robust standard errors were used in logistic regression to account for correlation  
134 within prisons. The Wald test was used to assess significance of the contribution of

135 each variable to the model. Data analysis was performed using Stata/SE version 14  
136 (Stata Corporation, College Station, Texas, US).

137 **Figure 1. Hypothesized conceptual framework to guide model building for**  
138 **multivariate analysis**

139

140 **RESULTS**

141 A total of 16,132 prisoners from 5 central prisons agreed to participate in the study and  
142 completed the questionnaire. Of these, 13,868 prisoners were screened using Xpert, of  
143 which 105 had either an invalid or erroneous final result. Thus, the final analysis  
144 included 13,763 prisoners with valid Xpert result.

145 ***Baseline characteristics***

146 Of the 13,763 prisoners, majority (96.3%, n=13,248) were male. The median age of  
147 screened prisoners was 30 years (IQR 24–36 years) while 64.7% were younger than 35  
148 years. A total of 9,077 (66.0%) prisoners screened were new admissions and 12,035  
149 (87.4%) were in prison for the first time. The median duration of incarceration was 1.5  
150 months at the time point of study participation and sharing a cell with more than 10  
151 inmates was common (93.8%, n=12,911). More than half (51.6%, n=7,106) had  
152 unknown HIV status, and 6.1% (n=833) were HIV positive (Table 1).

153

154 TABLE 1. Characteristics of the study population and TB cases

| Characteristics                     | Categories    | Total<br>(col%)<br>[N=13,763] | Prisoners with<br>tuberculosis<br>(col%)<br>[N=214] | Prevalence of<br>Tuberculosis<br>in % | P-value* |
|-------------------------------------|---------------|-------------------------------|-----------------------------------------------------|---------------------------------------|----------|
| Sex                                 | Female        | 515 ( 3.7)                    | 4 (1.9)                                             | 0.78                                  | 0.150    |
|                                     | Male          | 13,248 (96.3)                 | 210 (98.1)                                          | 1.59                                  |          |
| Age in years                        | <25           | 3,731 (27.1)                  | 35 (16.4)                                           | 0.94                                  | 0.004    |
|                                     | 25-34         | 5,177 (37.6)                  | 87 (40.7)                                           | 1.68                                  |          |
|                                     | 35-44         | 3,030 (22.0)                  | 58 (27.1)                                           | 1.91                                  |          |
|                                     | >45           | 1,825 (13.3)                  | 34 (15.9)                                           | 1.86                                  |          |
| Prisoner Status                     | New Admission | 9,077 (66.0)                  | 132 (61.7)                                          | 1.45                                  | 0.184    |
|                                     | Inmate        | 4,686 (34.0)                  | 82 (38.3)                                           | 1.75                                  |          |
| Duration of<br>Incarceration        | <6 months     | 8,643 (62.8)                  | 114 (53.3)                                          | 1.32                                  | 0.023    |
|                                     | 6-24 months   | 1,703 (12.4)                  | 37 (17.3)                                           | 2.17                                  |          |
|                                     | 24-60 months  | 1,246 (9.1)                   | 21 (9.8)                                            | 1.69                                  |          |
|                                     | >60 months    | 2,171 (15.8)                  | 42 (19.6)                                           | 1.93                                  |          |
| Number of<br>Incarcerations         | 1             | 12,035 (87.4)                 | 163 (76.2)                                          | 1.35                                  | <0.001   |
|                                     | 2-3           | 1,573 (11.4)                  | 41 (19.2)                                           | 2.61                                  |          |
|                                     | ≥4            | 155 (1.1)                     | 10 (4.7)                                            | 6.45                                  |          |
| Number of Cell Mates                | <5            | 47 (0.3)                      | 2 (0.9)                                             | 4.26                                  | 0.195    |
|                                     | 6-10          | 805 (5.9)                     | 9 (4.2)                                             | 1.12                                  |          |
|                                     | >10           | 2,911 (93.8)                  | 203 (94.9)                                          | 1.57                                  |          |
| Known TB contact<br>from Cell Mate  | No            | 13,713 (99.6)                 | 212 (99.1)                                          | 1.55                                  | 0.162    |
|                                     | Yes           | 50 (0.4)                      | 2 (0.9)                                             | 4.00                                  |          |
| Previously treated for<br>TB        | Yes           | 666 (4.8)                     | 33 (15.4)                                           | 4.95                                  | <0.001   |
|                                     | No            | 13,097 (95.2)                 | 181 (84.6)                                          | 1.38                                  |          |
| Reported one or more<br>TB symptoms | Yes           | 2,261 (16.4)                  | 92 (43.0)                                           | 4.07                                  | <0.001   |
|                                     | No            | 11,502 (83.6)                 | 122 (57.0)                                          | 1.06                                  |          |
| HIV Status                          | Negative      | 5,824 (42.3)                  | 85 (39.7)                                           | 1.46                                  | <0.001   |
|                                     | Positive      | 833 (6.1)                     | 40 (18.7)                                           | 4.80                                  |          |
|                                     | Not Known     | 7,106 (51.6)                  | 89 (41.6)                                           | 1.25                                  |          |
| Prison ID                           | Ruanda        | 4520 (32.8)                   | 42 (19.6)                                           | 0.98                                  | <0.001   |
|                                     | Butimba       | 4328 (31.5)                   | 48 (22.4)                                           | 1.12                                  |          |
|                                     | Ukonga        | 828 (6.0)                     | 32 (15.0)                                           | 4.02                                  |          |
|                                     | Keko          | 1921 (14.0)                   | 26 (12.2)                                           | 1.37                                  |          |
|                                     | Segerea       | 2166 (15.7)                   | 66 (30.8)                                           | 0.03                                  |          |

155 \*chi squared test p-value for difference in TB-prevalence between strata

156 ***Risk factors associated with TB diagnosis***

157 In multivariable analysis, males had more than two times the odds for TB infection than  
158 females (Odds Ratio [OR] = 2.51, 95% confidence interval [CI] = 1.54 to 4.08, p-value  
159 [p] = <0.001). Age did not appear to be an important independent risk factor for active  
160 TB. The OR significantly increased with the frequency of incarcerations to nearly three  
161 times higher odd for active TB in prisoners who have been in prison four or more times  
162 (OR=2.85 CI=1.78 to 4.55, p<0.001). Previous history of TB treatment was associated  
163 with current active TB disease (OR=1.78, CI=1.24 to 2.55, p=0.002). Participants with  
164 TB symptoms were three times more likely to test positive for TB than those without  
165 symptoms (OR=2.78, CI=1.35 to 5.74, p<0.006) and HIV positive prisoners also had  
166 significantly higher odds of TB than HIV-negative prisoners (OR=2.86, CI=1.49 to 5.52,  
167 p=0.002). Being incarcerated in prisons located in the business capital, Ukonga prison  
168 (which admits convicted offenders) or Segerea prison (which admits new remandees)  
169 was associated with a two times higher OR for having TB (OR= 2.15, CI 1.63 to 2.83,  
170 p<0.001 and OR=2.10, CI 1.75 to 2.52, p<0.001 respectively). Sharing a cell with more  
171 than 10 people was not associated with TB infection (Table 2).



172 TABLE 2. Association of various factors with TB disease (N = 13,763; n= 214 (1.555%): Uni-  
 173 and multi-variable logistic regression results; using robust variance estimates adjusted for  
 174 clustering by PrisonID.

| Covariate                        | N      | n   | %     | Univariable |                |         | Multivariable |                |         |
|----------------------------------|--------|-----|-------|-------------|----------------|---------|---------------|----------------|---------|
|                                  |        |     |       | OR          | 95% CI         | p-value | OR            | 95% CI         | p-value |
| <b>Sex</b>                       |        |     |       |             |                |         |               |                |         |
| Female*                          | 515    | 4   | 0.777 | 1.00        | -              | -       | 1.00          | -              | -       |
| Male                             | 13,248 | 210 | 1.585 | 2.06        | (1.03 to 4.11) | 0.041   | 2.51          | (1.54 to 4.08) | <0.001  |
| <b>agegroup</b>                  |        |     |       |             |                |         |               |                |         |
| < 25 yrs*                        | 3,731  | 35  | 0.938 | 1.00        | -              | -       | 1.00          | -              | -       |
| 25 - <35 yrs                     | 5,177  | 87  | 1.681 | 1.80        | (1.49 to 2.19) | <0.001  | 1.31          | (0.97 to 1.78) | 0.083   |
| 35 - <45 yrs                     | 3,030  | 58  | 1.914 | 2.06        | (1.33 to 3.20) | 0.001   | 1.28          | (0.75 to 2.21) | 0.365   |
| >=45 yrs                         | 1,825  | 34  | 1.863 | 2.00        | (0.98 to 4.11) | 0.058   | 1.30          | (0.70 to 2.42) | 0.399   |
| <b>Number of Incarcerations</b>  |        |     |       |             |                |         |               |                |         |
| 1*                               | 12,035 | 163 | 1.354 | 1.00        | -              | -       | 1.00          | -              | -       |
| 2-3                              | 1,573  | 41  | 2.606 | 1.95        | (1.15 to 3.31) | 0.013   | 1.57          | (1.17 to 2.09) | 0.002   |
| >4                               | 155    | 10  | 6.452 | 5.02        | (2.57 to 9.81) | <0.001  | 2.85          | (1.78 to 4.55) | <0.001  |
| <b>Duration of Incarceration</b> |        |     |       |             |                |         |               |                |         |
| <=6 months*                      | 8,643  | 114 | 1.319 | 1.00        | -              | -       | 1.00          | -              | -       |
| 6 - 24 months                    | 1,703  | 37  | 2.173 | 1.66        | (1.35 to 2.05) | <0.001  | 1.31          | (1.07 to 1.62) | 0.010   |
| 24 - 60 months                   | 1,246  | 21  | 1.685 | 1.28        | (0.79 to 2.09) | 0.318   | 0.87          | (0.61 to 1.22) | 0.414   |
| >60 months                       | 2,171  | 42  | 1.935 | 1.48        | (0.72 to 3.05) | 0.292   | 0.95          | (0.77 to 1.18) | 0.669   |
| <b>HIV Result</b>                |        |     |       |             |                |         |               |                |         |
| Negative*                        | 5,824  | 85  | 1.459 | 1.00        | -              | -       | 1.00          | -              | -       |
| Positive                         | 833    | 40  | 4.802 | 3.41        | (1.68 to 6.89) | <0.001  | 2.86          | (1.49 to 5.52) | 0.002   |
| Unknown                          | 7,106  | 89  | 1.252 | 0.86        | (0.67 to 1.09) | 0.214   | 1.18          | (0.86 to 1.61) | 0.314   |
| <b>History of TB Treatment</b>   |        |     |       |             |                |         |               |                |         |
| No*                              | 13,097 | 181 | 1.382 | 1.00        | -              | -       | 1.00          | -              | -       |
| Yes                              | 666    | 33  | 4.955 | 3.72        | (2.87 to 4.82) | <0.001  | 1.78          | (1.24 to 2.55) | 0.002   |
| <b>Number of Cell Mates</b>      |        |     |       |             |                |         |               |                |         |
| <10*                             | 852    | 11  | 1.291 | 1.00        | -              | -       | 1.00          | -              | -       |
| >10                              | 12,911 | 203 | 1.572 | 1.22        | (0.89 to 1.68) | 0.216   | 0.93          | (0.74 to 1.18) | 0.570   |
| <b>Any TB Symptoms</b>           |        |     |       |             |                |         |               |                |         |
| No*                              | 11,502 | 122 | 1.061 | 1.00        | -              | -       | 1.00          | -              | -       |
| Yes                              | 2,261  | 92  | 4.069 | 3.96        | (2.13 to 7.35) | <0.001  | 2.78          | (1.35 to 5.74) | 0.006   |
| <b>PrisonID</b>                  |        |     |       |             |                |         |               |                |         |
| Ruanda*                          | 4,520  | 42  | 0.929 | 1.00        | -              | -       | 1.00          | -              | -       |
| Butimba                          | 4,328  | 48  | 1.109 | 1.20        | (1.20 to 1.20) | <0.001  | 1.10          | (1.02 to 1.20) | 0.019   |
| Ukonga                           | 828    | 32  | 3.865 | 4.29        | (4.29 to 4.29) | <0.001  | 2.15          | (1.63 to 2.83) | <0.001  |
| Keko                             | 1,921  | 26  | 1.353 | 1.46        | (1.46 to 1.46) | <0.001  | 1.08          | (1.01 to 1.15) | 0.027   |
| Segera                           | 2,166  | 66  | 3.047 | 3.35        | (3.35 to 3.35) | <0.001  | 2.10          | (1.75 to 2.52) | <0.001  |

N = number of observations; n= number of positives; %= percent positive; 95% CI = 95% confidence interval  
 \* reference stratum

## 175 **DISCUSSION**

176 Our findings show a high TB burden in Tanzania prisons. The prevalence of  
177 bacteriologically confirmed TB of 1.55% (1,550 cases/100,000 population) is more than  
178 5 times higher than the prevalence in the general population of 295 per 100,000<sup>18</sup>.

179 Our study contributes important findings over the containment of asymptomatic TB  
180 cases in prison settings. Sustained and prolonged exposure to TB bacilli could be  
181 maintained in prison walls by asymptomatic cases and can potentially propagate TB  
182 transmission among inmates if conventional symptomatic TB screening is the only  
183 screening method relied on since studies have shown that asymptomatic TB cases  
184 have the ability to infect others<sup>16,19-20</sup>. For this reason robust and effective approaches  
185 using effective diagnostic tools for TB screening in prisoners are required. Nonetheless,  
186 TB symptoms remain a major predictor of TB disease as shown by a TB high  
187 prevalence in prisoners with symptoms compared to those without (4.07% vs 1.06%  
188 respectively). Therefore an effective screening intervention is the one that apply mixed  
189 methods that detect both symptomatic and asymptomatic TB.

190 Despite high TB prevalence among inmates, the fact that 61% of detected TB cases in  
191 this study were among new admissions suggests that new admissions bring TB into the  
192 prison facilities and therefore contribute significantly to the TB epidemic in prisons.  
193 These findings also observed in other studies<sup>21, 22</sup> in countries with high TB burden  
194 suggests two possible explanations; firstly, many of those who commit offenses and end  
195 up in a penal institution come from a background of high risk for TB infection and  
196 therefore bring with them an increased risk for TB infection into prison and actively  
197 contribute to the high prevalence of TB in prisons<sup>5</sup>. And secondly, it is highly likely that  
198 specific conditions in prisons lead to a higher risk of TB infection and accelerate latent  
199 TB infections to progress to active disease within a short duration of time. Many TB  
200 control strategies in prisons focus on already incarcerated inmates while little or no  
201 attention is given to new admissions. Findings from our study suggest that equal weight  
202 has to be given to both groups of prisoners. Constant screening at prison-entry aims at  
203 detecting untreated admissions and thereby reduce introduction of new TB cases into

204 prison while mass and contact screening should aim at detecting the circulating TB  
205 within the prison walls<sup>23</sup>.

206 Our findings do not suggest overcrowding to be a risk factor for TB disease in prison;  
207 however, this might be due to the possibility that the disaggregation by number of  
208 inmates per cell during data collection was not specific enough and hence it probably  
209 obscures the association. Similarly, having a known TB contact within the cells was not  
210 associated with TB infection in our study, however, this finding could be due to the fact  
211 that more than 50% of the identified TB cases were new entries who didn't have  
212 prolonged contact with other inmates during the time of screening. Yet, screening of  
213 individuals who have contact with index cases should still continue as recommended  
214 because it is effective in increasing case detection<sup>23, 24, 25</sup>. HIV remains an important  
215 single predictor of TB infection in prison settings as it is well known to fuel the TB  
216 epidemic<sup>26</sup>. Notably, effective control of TB infection also requires appropriate  
217 interventions against HIV infection.

218

## 219 **CONCLUSION AND RECOMMENDATIONS**

220 Our study showed a high TB burden in Tanzanian prisons. The majority of positive TB  
221 tests was among symptomatic prisoners, new entries and inmates who stayed only for a  
222 short time in prison. Other TB risk factors were not prison-associated. Prisoners remain  
223 a high risk population with great mobility due to perpetuating referrals between prisons  
224 and interactions with the outside communities; our results suggest that TB screening  
225 measures within prisons need to be sensitive, robust and with a fast enough turn-over  
226 time to combat TB in prisoners and consequently interrupt TB transmission not only in  
227 prisons but also in the surrounding communities.

228 TB screening on admission or exit for both remandees and inmates using WHO  
229 recommended PCR based rapid diagnostics such as GeneXpert was not a routine  
230 practice in Tanzania prisons at the time of this study. However, because of the findings  
231 of this study, active TB screening on all prison entry points have been implemented in

232 Tanzania ever since. Future research is needed to assess the impact of the  
233 implementation of WHO approved rapid TB diagnostic tools in prison settings.

234

## 235 **Acknowledgements**

236 We acknowledge the effort from all collaborating institutions implementing the study,  
237 NIMR-Mbeya Centre, Tanzania (project lead); PharmAccess International, Tanzania;  
238 Medical Mission Institute of Wuerzburg, Germany; Bugando Referral Hospital,  
239 Tanzania; Division of Infectious Diseases and Tropical Medicine, University of Munich  
240 (LMU) Germany (grant holder). We thank the Tanzania Prison Authority Headquarter,  
241 and the National TB and Leprosy Program for facilitating study activities. To all the  
242 prison health staffs for your dedication and prisoners for your participation, we thank  
243 you.

244

## 245 **Conflicts of interests**

246 Authors declare no conflict of interest.

## 247 **Funding**

248 The project was funded by the WHO, STOP TB Partnership through the TB REACH  
249 funding initiative.

## 250 **Authors Contribution**

251 CDM, PC, MH, AR designed the study, applied for grant, supervised study  
252 implementation, and reviewed the manuscript.

253 CDM, ES performed data analysis.

254 JH, CM, JA, FK, MM, SK, LG, CK, AM, DK, & NE reviewed the study design,  
255 coordinated and supervised study implementation, and reviewed the manuscript;

256 CDM wrote the manuscript

## 257 **References**

- 258 1. Dye C. Global Epidemiology of tuberculosis. *Lancet* 2006; 367:938-40.
- 259 2. Dye C, Lönnroth K, Jaramillo E, Williamsa BG, and Raviglionea M. Trends in  
260 tuberculosis incidence and their determinants in 134 countries. *Bulletin of the*  
261 *World Health Organization*. 2009; 87(683-691):
- 262 3. WORLD HEALTH ORGANIZATION *Global Tuberculosis Report 2022*. ISBN 978-  
263 92-4-001313-1. WHO Press, Geneva, 2020. 1-208.
- 264 4. Dara M, Acosta CD, Melchers NV, Al-Darraji HA, Chorgoliani D, Reyes H, et al.  
265 Tuberculosis control in prisons: current situation and research gaps. *Int J Infect*  
266 *Dis*. 2015 Mar; 32:111-7.
- 267 5. Reyes HN. Pitfalls of TB Management in Prisons, Revisited. *International Journal*  
268 *of Prisoner Health*, 2007; 3(1).43-67
- 269 6. Baussano I, Williams BG, Nunn P, Beggiato M, Fedeli U, Scano F. Tuberculosis  
270 Incidence in Prisons: A Systematic Review. *PLoS Med* 2010; 7(12): e1000381.  
271 Available from:  
272 <https://journals.plos.org/plosmedicine/article?id=10.1371/journal.pmed.1000381>
- 273 7. WOLRD HEALTH ORGANIZATION. Literature Review on Tuberculosis in  
274 Prisons. Geneva, WHO 2008: 1-16
- 275 8. THE PLoS MEDICINE EDITORS. The Health Crisis of Tuberculosis in Prisons  
276 Extends beyond the Prison Walls. *PLoS Med* 2010; 7(12): Available from:  
277 <https://journals.plos.org/plosmedicine/article?id=10.1371/journal.pmed.1000383>
- 278 9. Nyangulu DS, Harries AD, Kangombe C, Yadidi AE, Chokani K, Culliana T, et al.  
279 Tuberculosis in a prison population in Malawi. *The Lancet*. 1997; 350(9087).  
280 1284-7.
- 281 10. Koffi N, Ngom AK, Aka-Danguy E, Seka A, Akoto A, Fadiga D. Smear positive  
282 pulmonary tuberculosis in a prison setting: Experience in the penal camp of  
283 Bouake, Ivory Coast. *Int J Tuberc Lung Dis*. 1997; 1(3).250-3.
- 284 11. Habeenzu C, Mitarai S, Lubasi D, Mudenda V, Katenga T, Mwansa J, et al.  
285 Tuberculosis and multidrug resistance in Zambian prisons, 2000-2001. *Int J*  
286 *Tuberc Lung Dis*. 2007 Nov; 11(11):1216-20

- 287 12. Noeske J, Kauban C, Amougou G, Pibello A, Poillot R. Pulmonary tuberculosis in  
288 the Central Prison of Douala, Cameroon. *East Afr Med J.* 2006; 83(1):25-30
- 289 13. Abebe DS, Bjune G, Ameni G, Biffa D, Abebe F. Prevalence of pulmonary  
290 tuberculosis and associated risk factors in Eastern Ethiopian prisons. *Int J*  
291 *Tuberc Lung Dis.* 2011; 15(5):668-73.
- 292 14. O'Grady J, Hoelscher M, Atun R, Bates M, Mwaba P, Kapata N, et al.  
293 Tuberculosis in prisons in sub-Saharan Africa the need for improved health  
294 services surveillance and control. *Elsevier* 2010; 10(12):1-6.
- 295 15. Rutta E, Mutasigwa D, Ngallba S, Mwansasu A. Tuberculosis in a prison  
296 population in Mwanza, Tanzania. *Int J Tuberc Lung Dis.* 2001; 5(8):703-6.
- 297 16. Reid ES, Topp SE, Turnbull ER, Hatwiinda S, Harris JB, Maggard KR, et al.  
298 Tuberculosis and HIV Control in Sub-Saharan African Prisons: "Thinking Outside  
299 the Prison Cell". *J Infect Dis.* 2012; 205(Suppl 2): S265-73
- 300 17. WORLD HEALTH ORGANIZATION. Consolidated guidelines on tuberculosis.  
301 Module 3: diagnosis-rapid diagnostics for tuberculosis detection, 2021 update.  
302 Geneva: World Health Organization; 2021. 1-137
- 303 18. UNITED REPUBLIC OF TANZANIA, MINISTRY OF HEALTH AND SOCIAL  
304 WELFARE. *The First National Tuberculosis Prevalence Survey in the United*  
305 *Republic of Tanzania, Final Report.* Dar Es Salaam, [publisher unknown], 2013.  
306 1-156
- 307 19. Shaw JB, Ynn-Williams N. Infectivity of pulmonary tuberculosis in relation to  
308 sputum status. *Am. Rev. Tuberc.* 1954; **69**:724-32.
- 309 20. Tostmann A, Kik VS, Lakisvaart AN, Sebek MM, Verver S, Boeree JM, et al.  
310 Tuberculosis Transmission by Patients with Smear-Negative Pulmonary  
311 Tuberculosis in a Large Cohort in The Netherlands. *Clin Infect Dis.* 2008; 47  
312 (9):1135-42.
- 313 21. Moges B, Amare B, Asfaw F, Tesfaye W, Tiruneh M, Belyhun Y, et al.  
314 Prevalence of smear positive pulmonary tuberculosis among prisoners in North  
315 Gonder Zone Prison, Northwest Ethiopia. *BMC Infectious Disease* 2012;  
316 12(352):1471-2334.
- 317 22. Winetsky DE, Almukhamedov O, Pulatov D, Vezhinina N, Dooronbekova A,  
318 Zhussupov B. Prevalence, Risk Factors and Social Context of Active Pulmonary

- 319 Tuberculosis among Prison Inmates in Tajikistan PLoS Med 2014; 9(1): e86046.  
320 Available from:  
321 <https://journals.plos.org/plosone/article?id=10.1371/journal.pone.0086046>
- 322 23. Dara M, Grzemska M, Kimerling ME, Reyes H and Zagorskiy A. Guidelines for  
323 Control of Tuberculosis in Prisons. [Internet] [place unknown] TB CAP 2009.  
324 [Cited: 24 June 2014]. 4-151. Available from:  
325 [https://www.challengeb.org/publications/tools/ua/Guidelines\\_for\\_control\\_of\\_TB\\_i](https://www.challengeb.org/publications/tools/ua/Guidelines_for_control_of_TB_in_prisons.pdf)  
326 [n\\_prisons.pdf](https://www.challengeb.org/publications/tools/ua/Guidelines_for_control_of_TB_in_prisons.pdf)
- 327 24. WORLD HEALTH ORGANISATION. WHO consolidated guidelines on  
328 tuberculosis. Module 2: screening – systematic screening for tuberculosis  
329 disease. Geneva: World Health Organization; 2021.
- 330 25. WORLD HEALTH ORGANISATION. Guidelines for the control of tuberculosis in  
331 prisons. Geneva: World Health Organization; 1998.
- 332 26. Corbett EL, Bandason T, Cheung YB, Munyati S, Godfrey-Fausset P.  
333 Epidemiology of Tuberculosis in a High HIV Prevalence Population Provided with  
334 Enhanced Diagnosis of Symptomatic Disease. PLoS Med 2007; 4(1): e22.  
335 Available from:  
336 <https://journals.plos.org/plosmedicine/article?id=10.1371/journal.pmed.0040022>

## Demographic Factors

1. Age
2. Sex

## Prison Environment and factors

1. Duration of Incarceration
2. Number of Incarcerations
3. Number of inmates sharing a cell
4. Specific Prison

## Clinical factors

1. Known TB Contact from cell mate
2. HIV Status
3. Previous history of TB treatment
4. TB Symptoms

Tuberculosis  
Disease

Figure 1

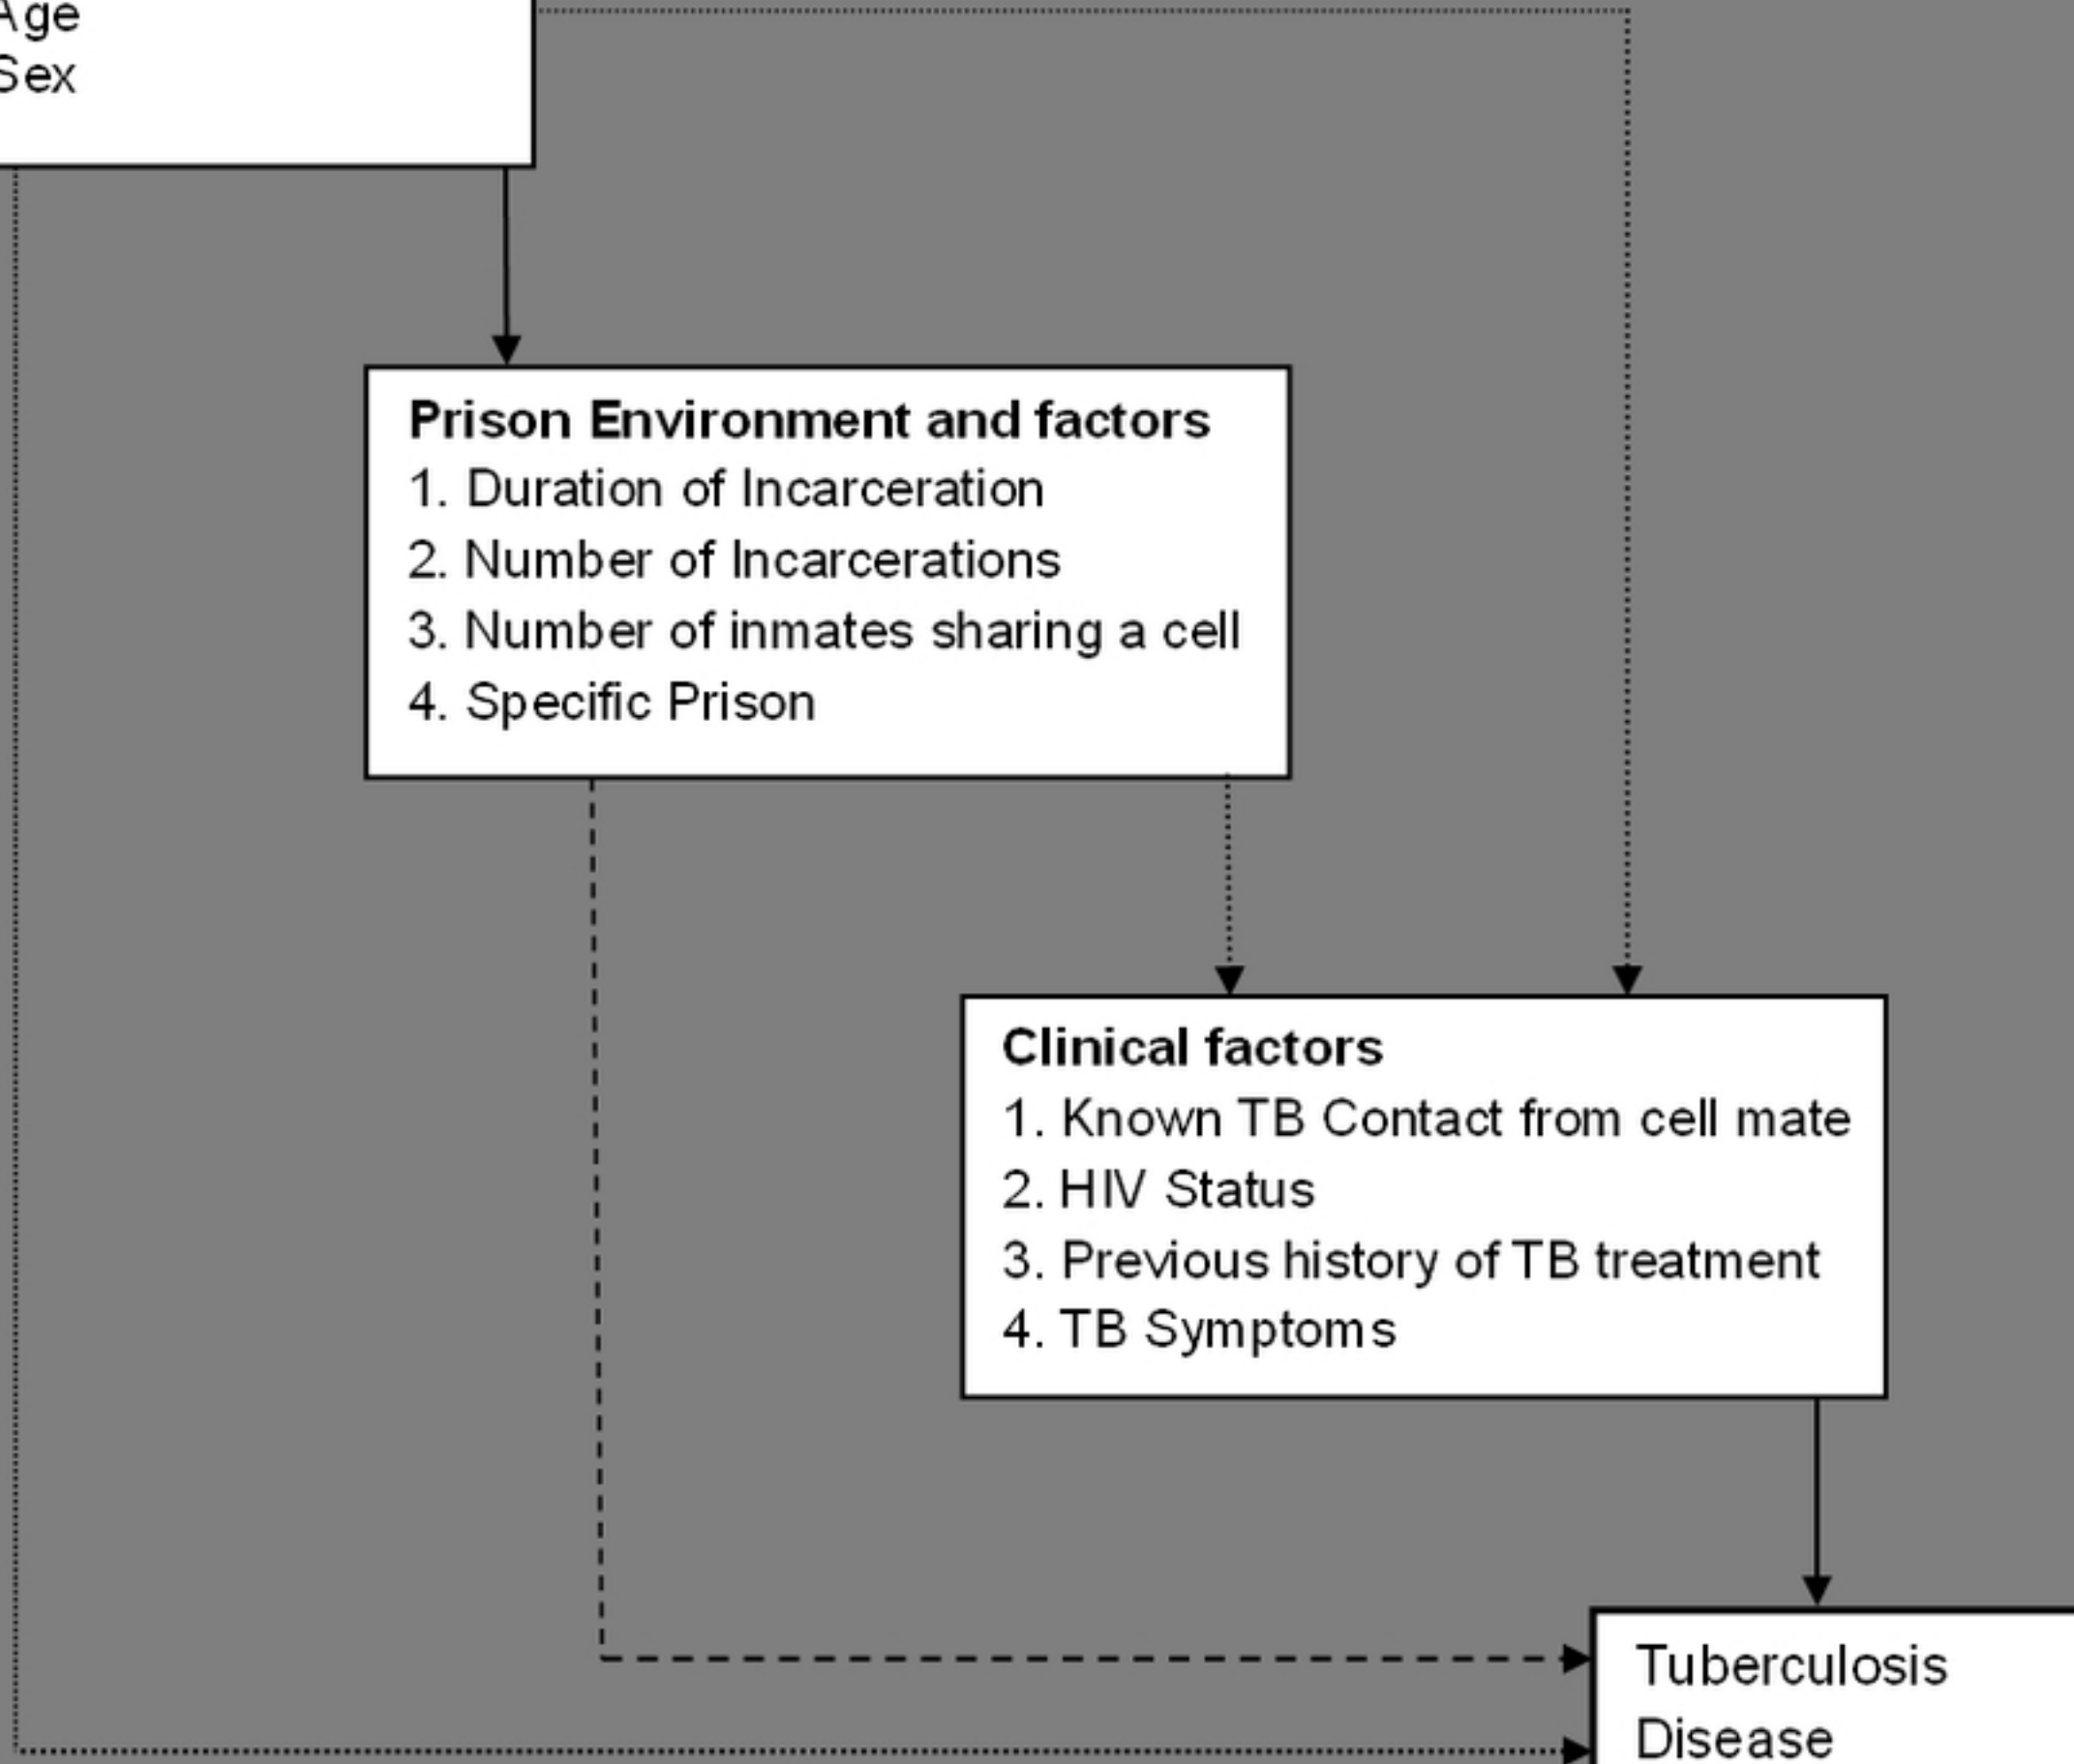

Source: https://medrxiv.org/content/10.1101/2023.08.23.23294476v1.full.pdf
